# Supplementary material for: Capsaicin alleviates acute alcohol-induced pyroptosis by activating ESCRT-III-dependent cell membrane repair in hepatocytes
Source: Royal Society of Chemistry journal article supplement (doi:10.1039/d4fo00806e), 2024-01-01

Figure 1E

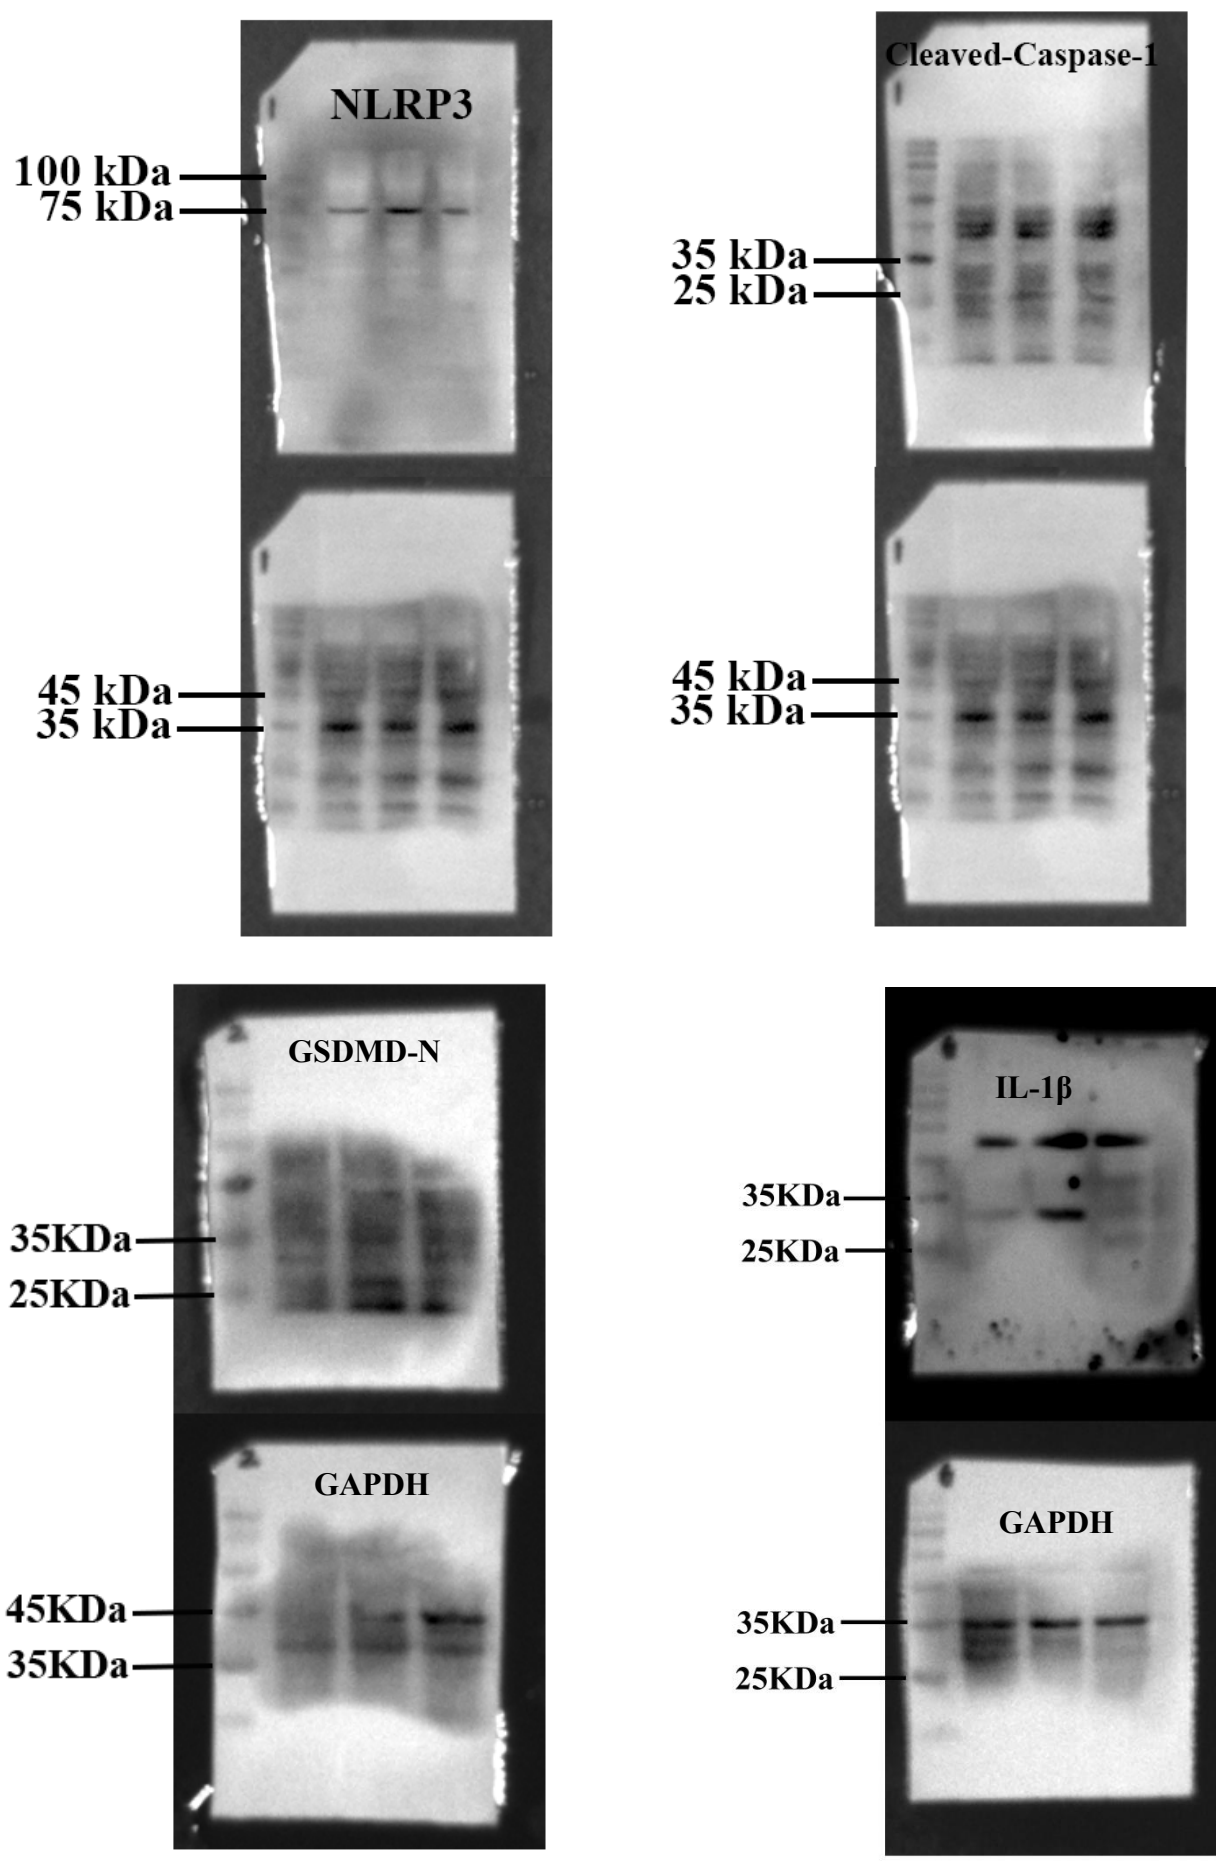

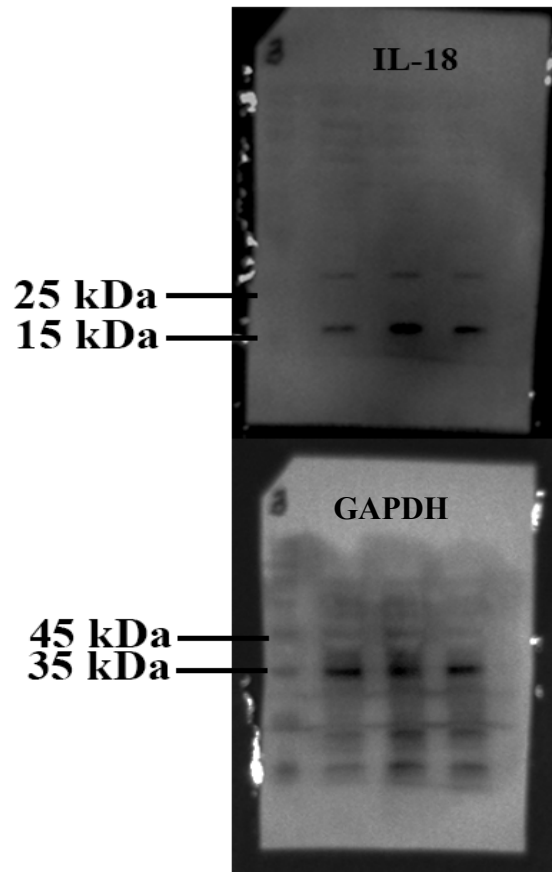

Figure 2F

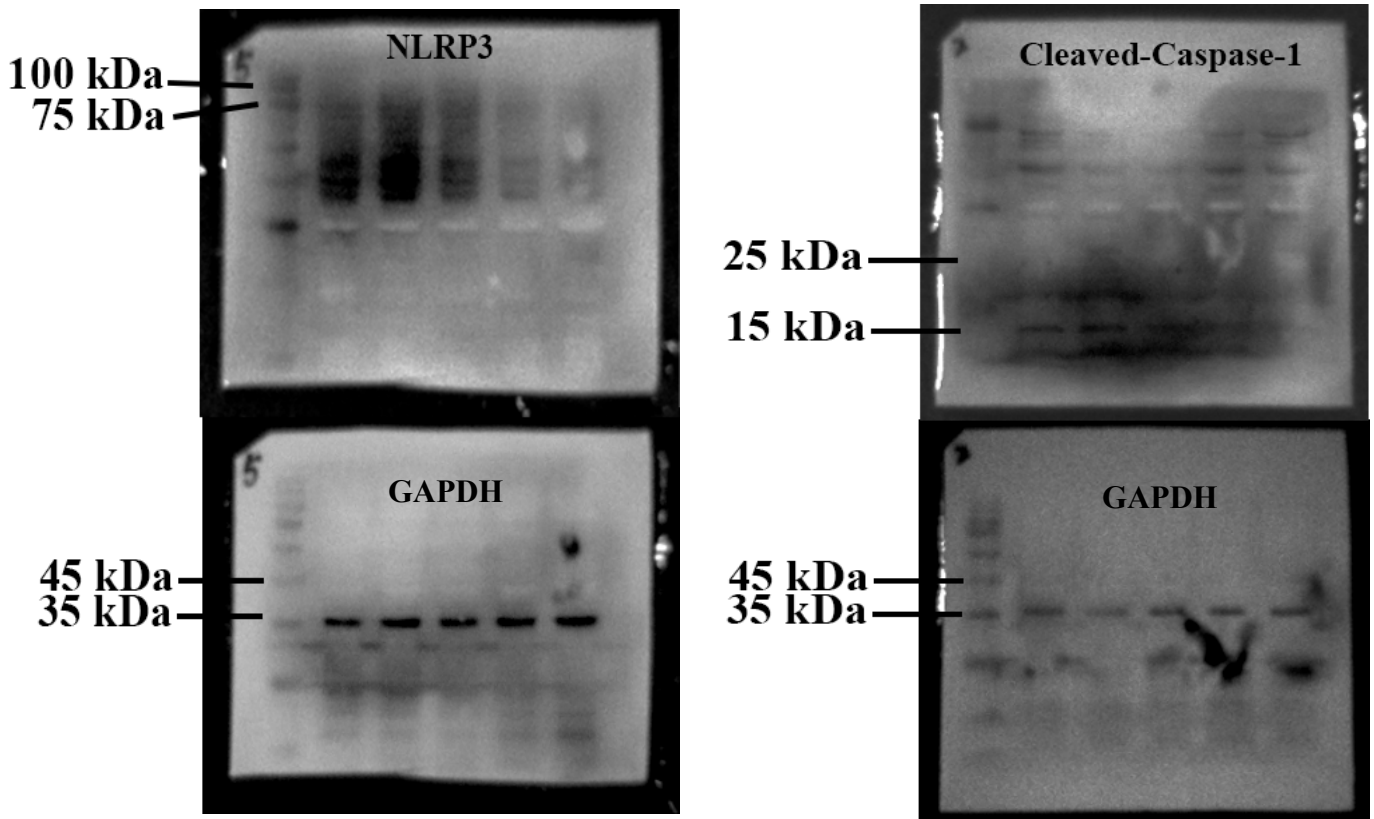

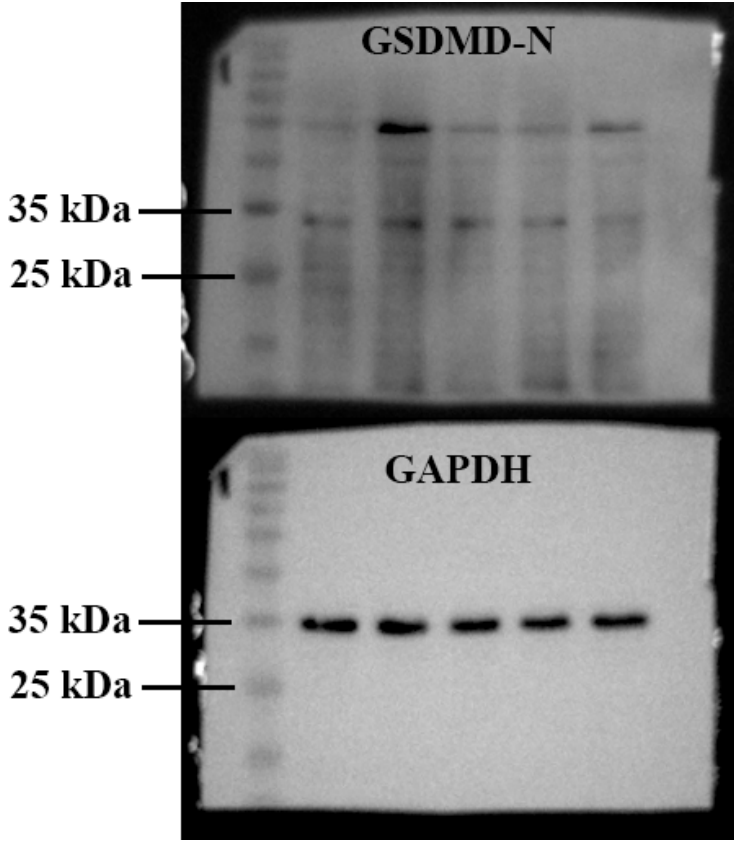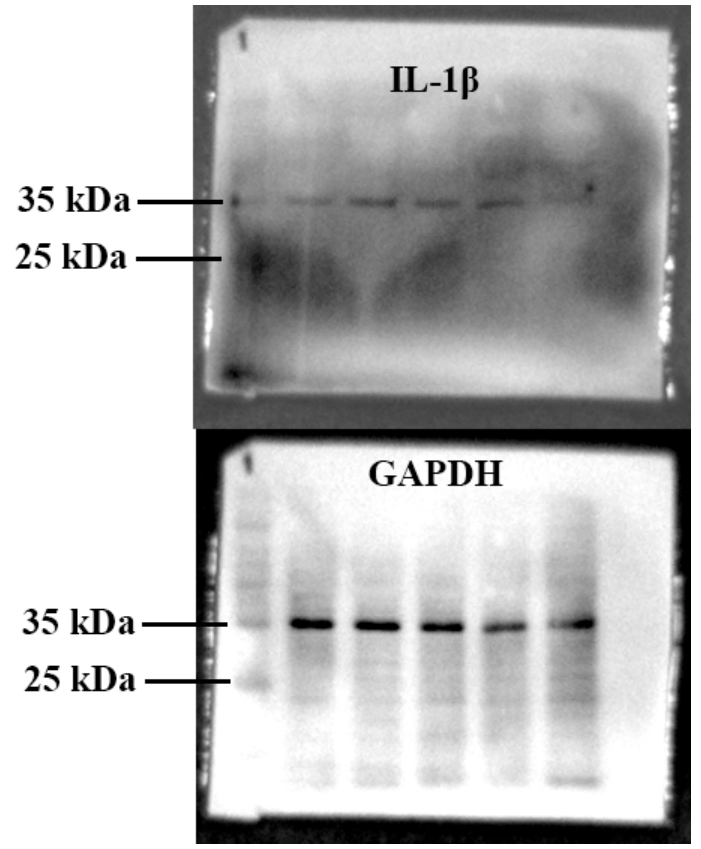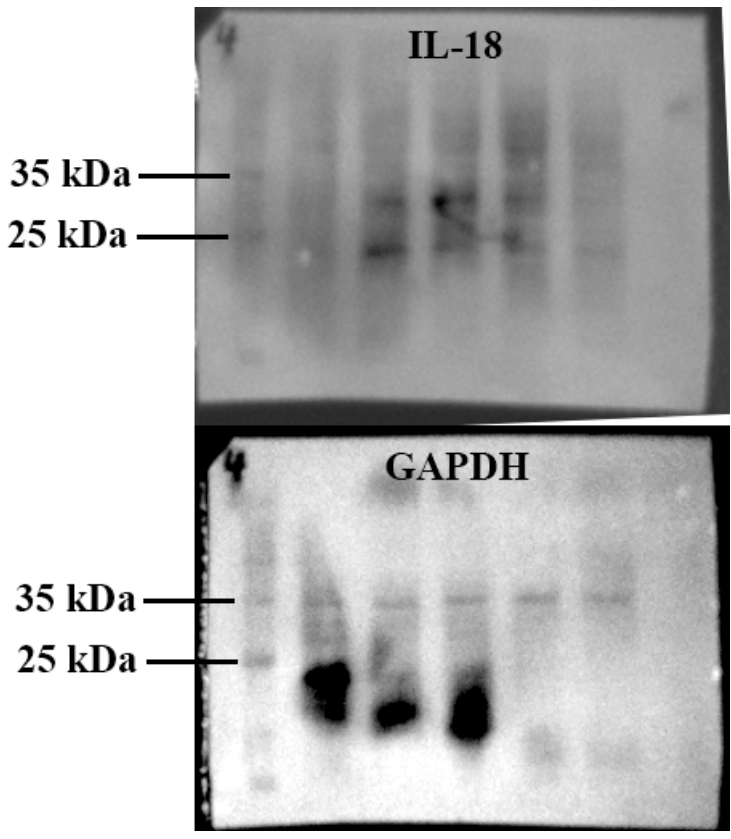

Figure 3A

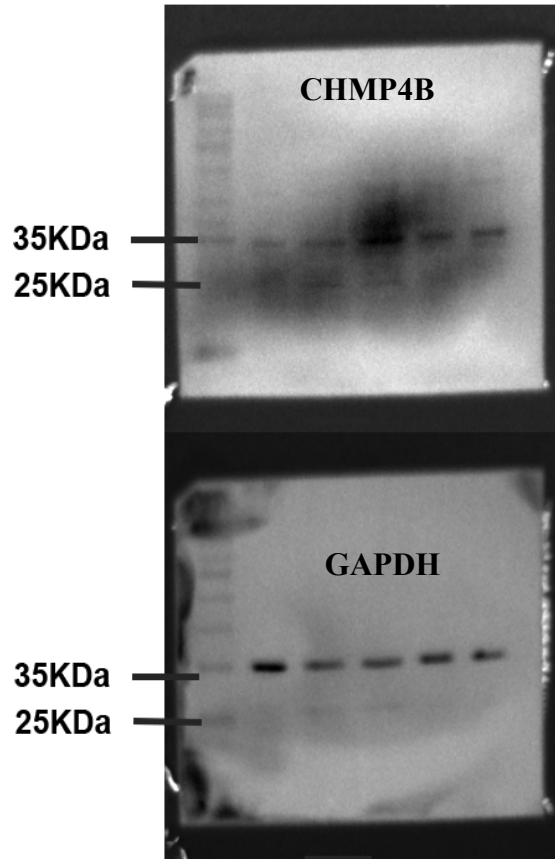

Figure 4D

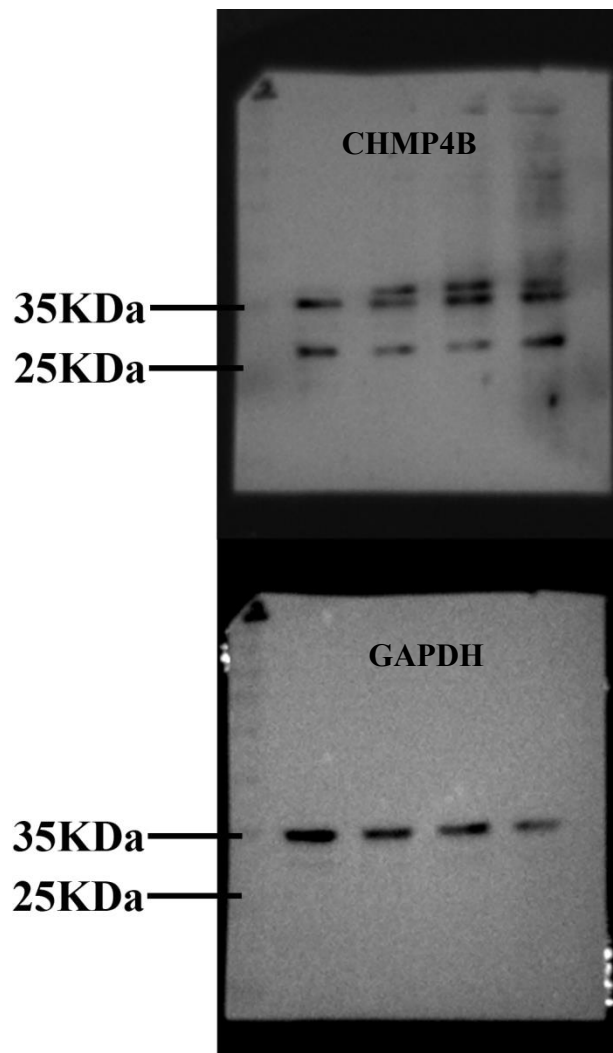

Figure 4G

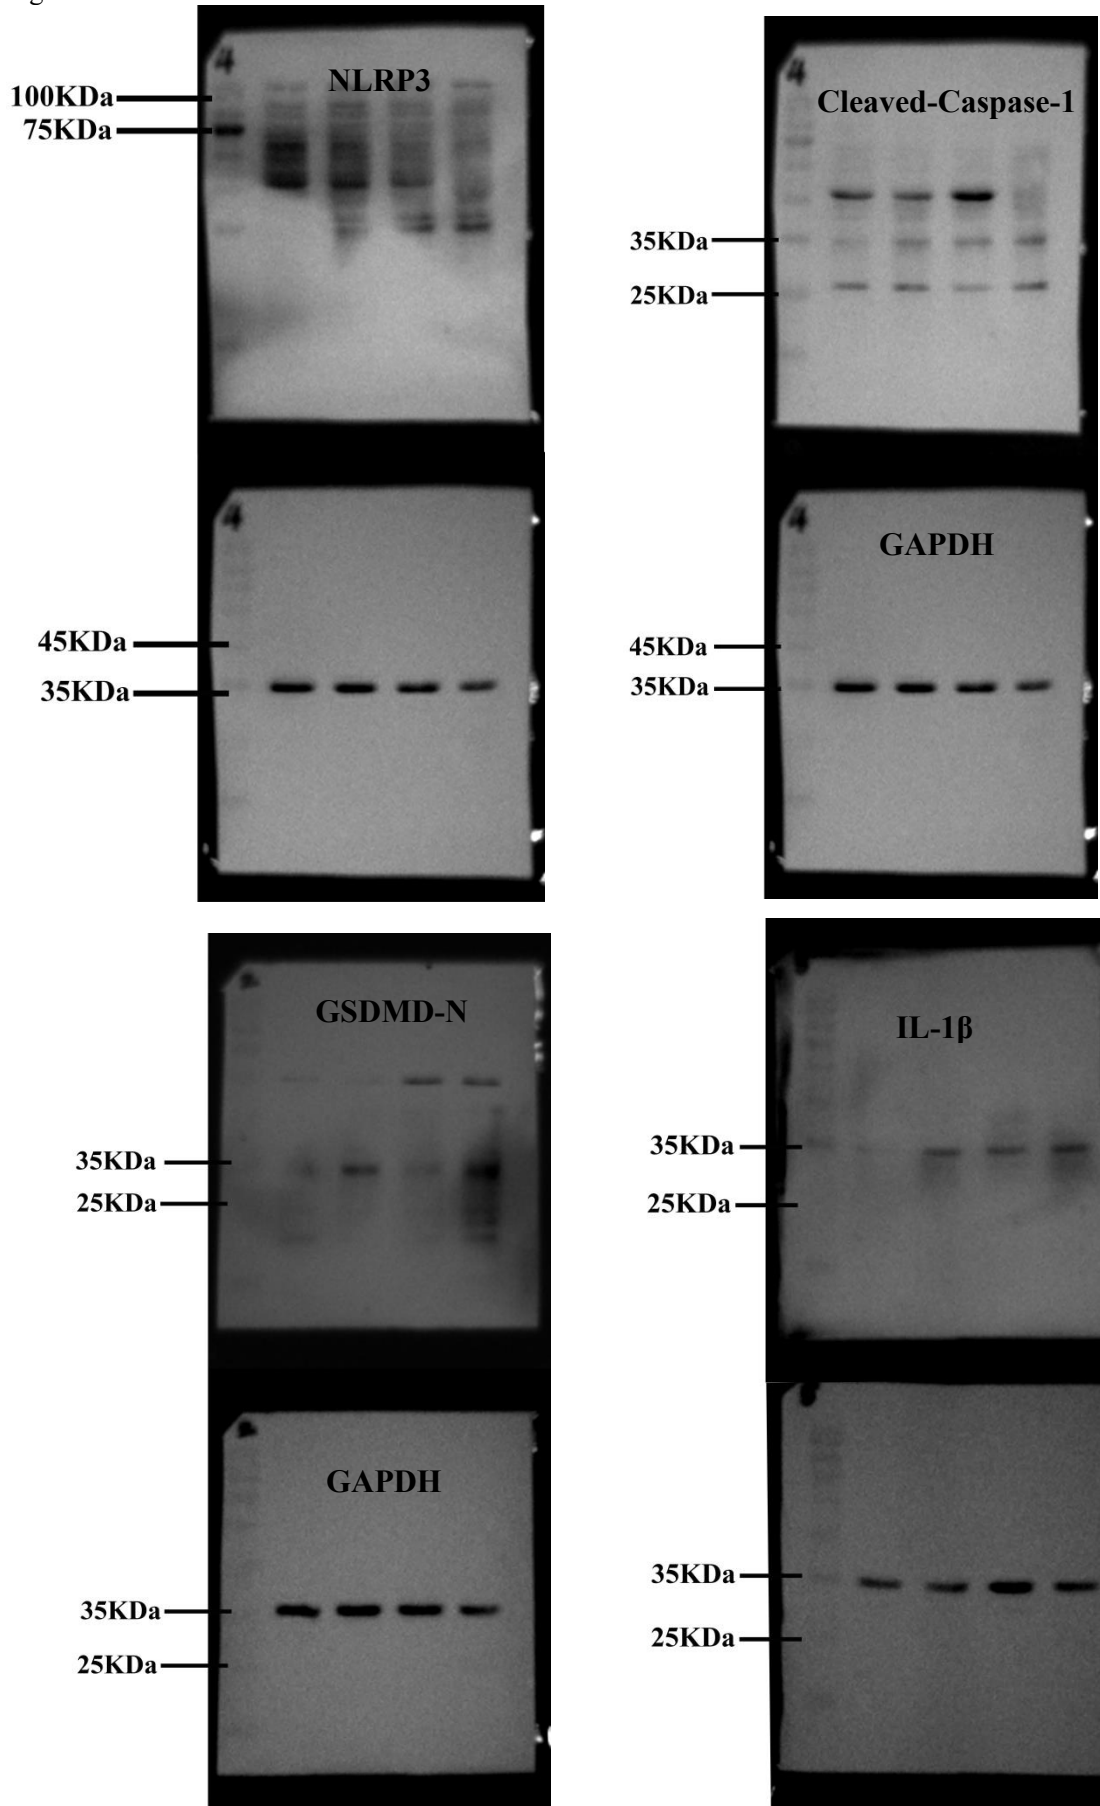

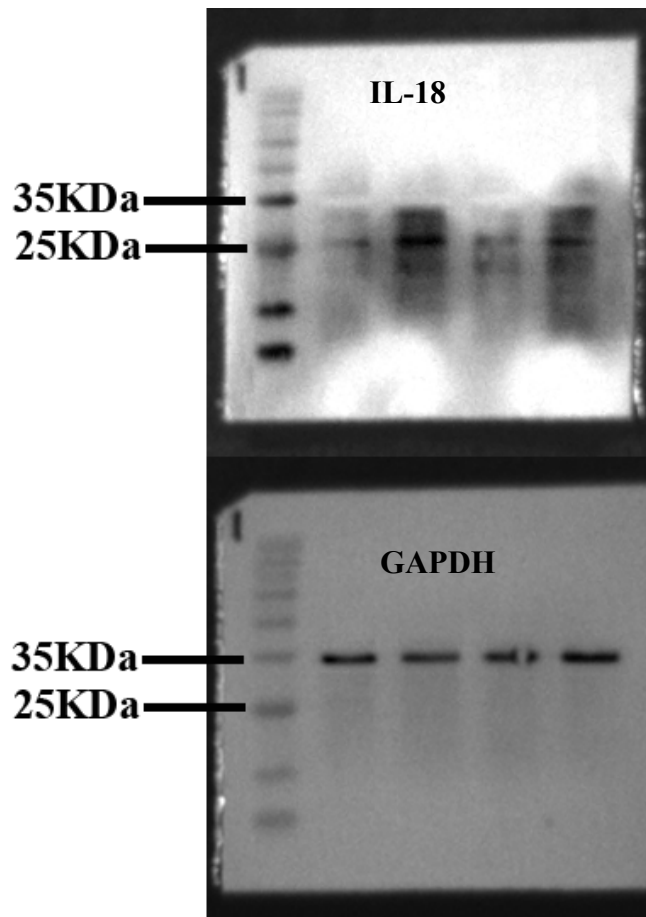

Figure 5B

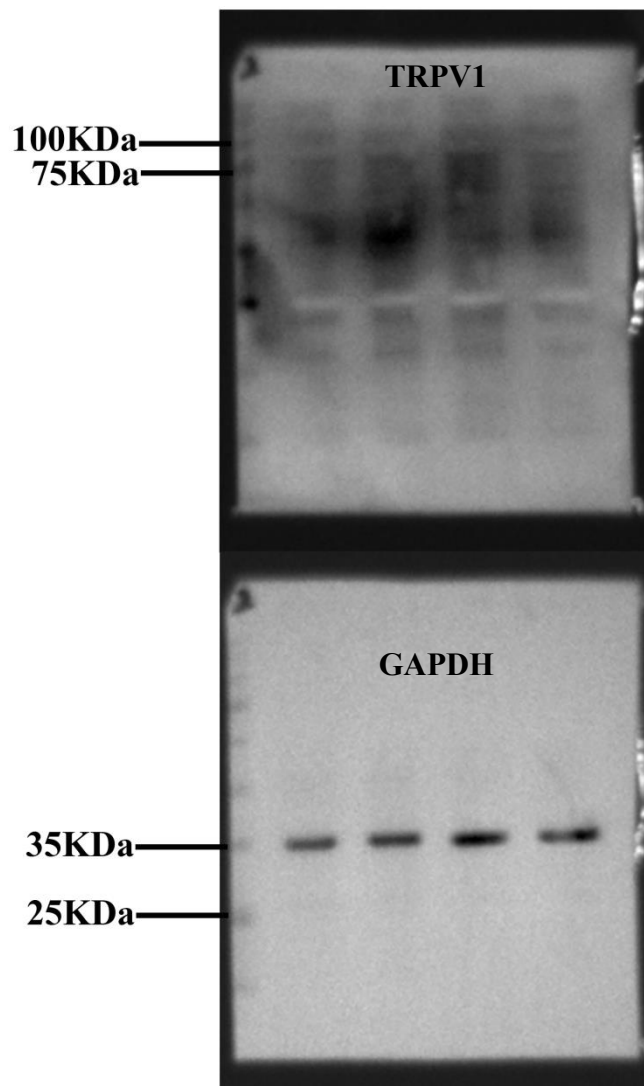

Figure 5E

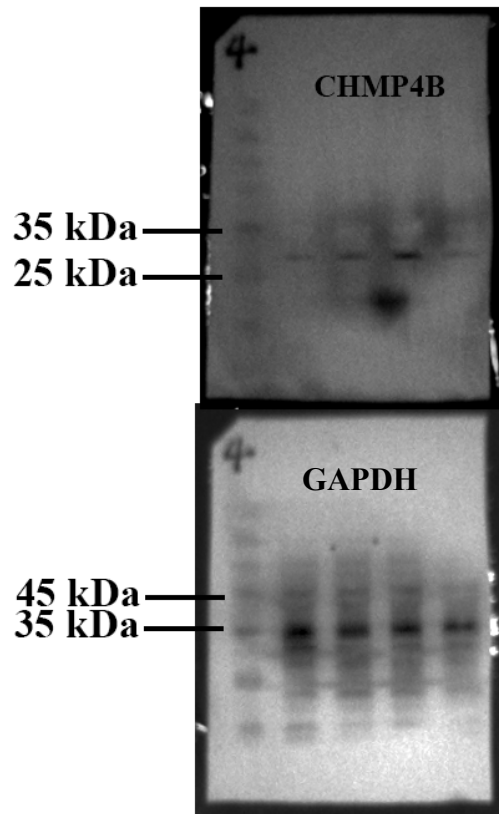

Figure 5J

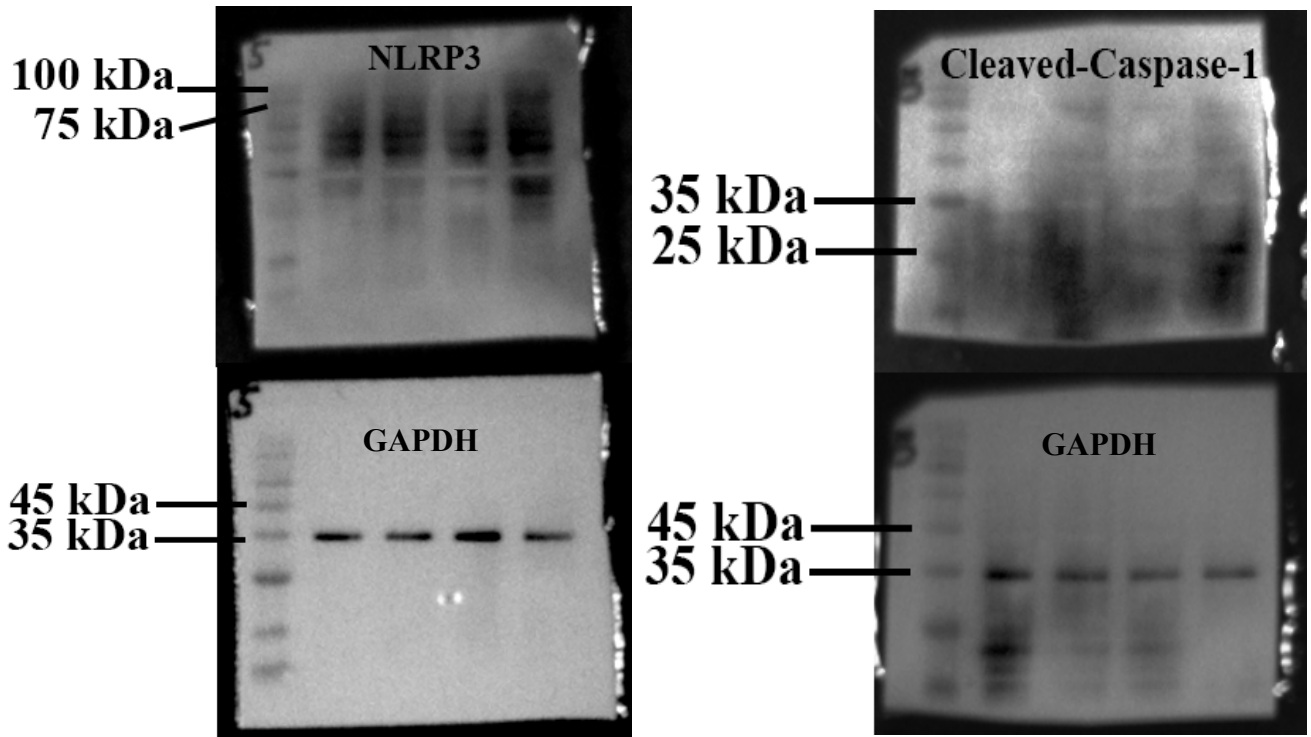

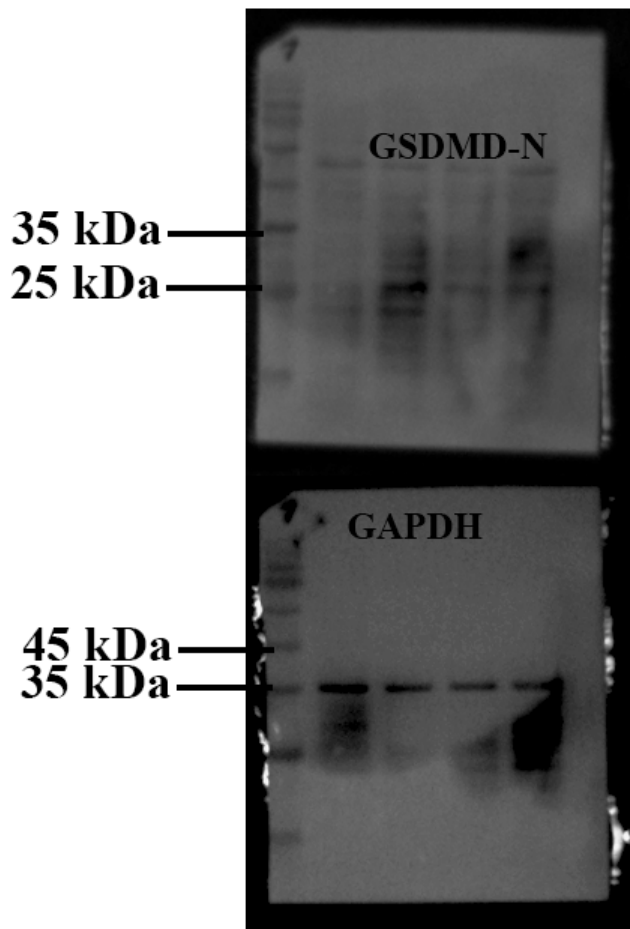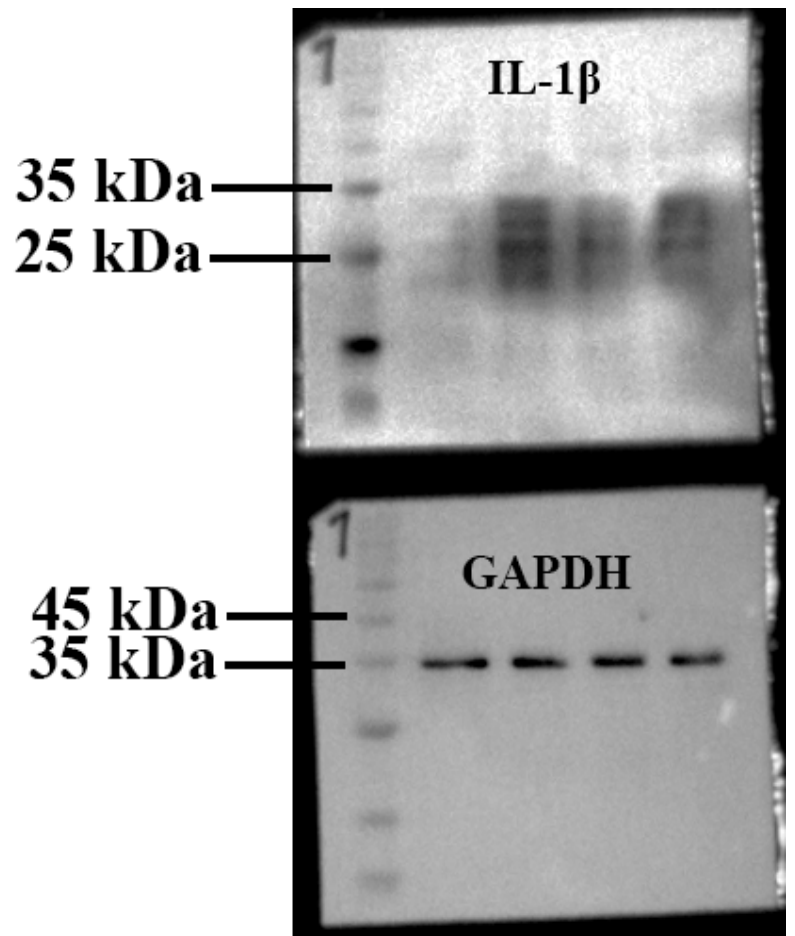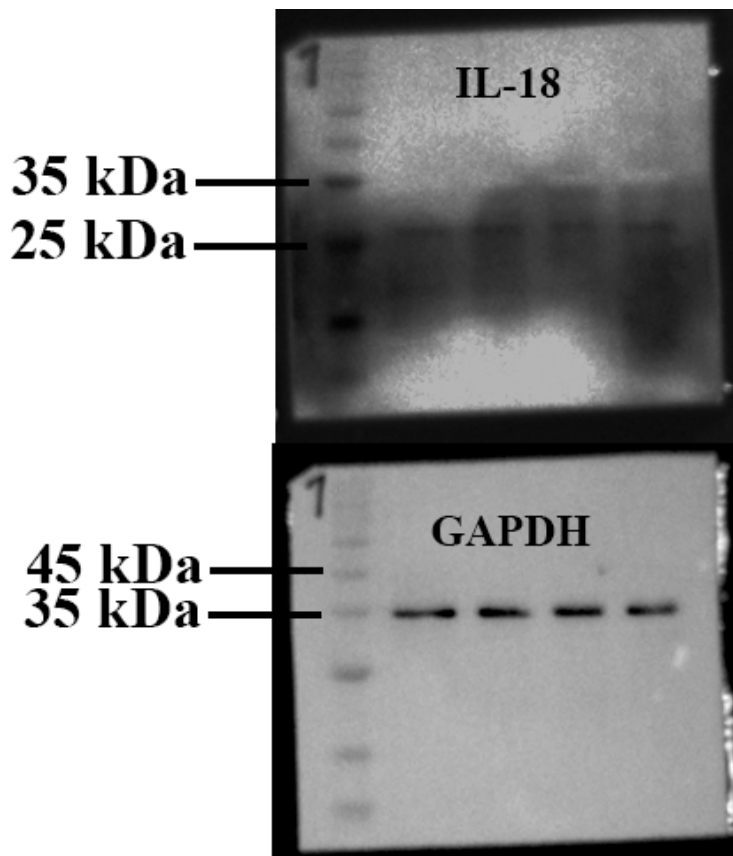



Figure 6A

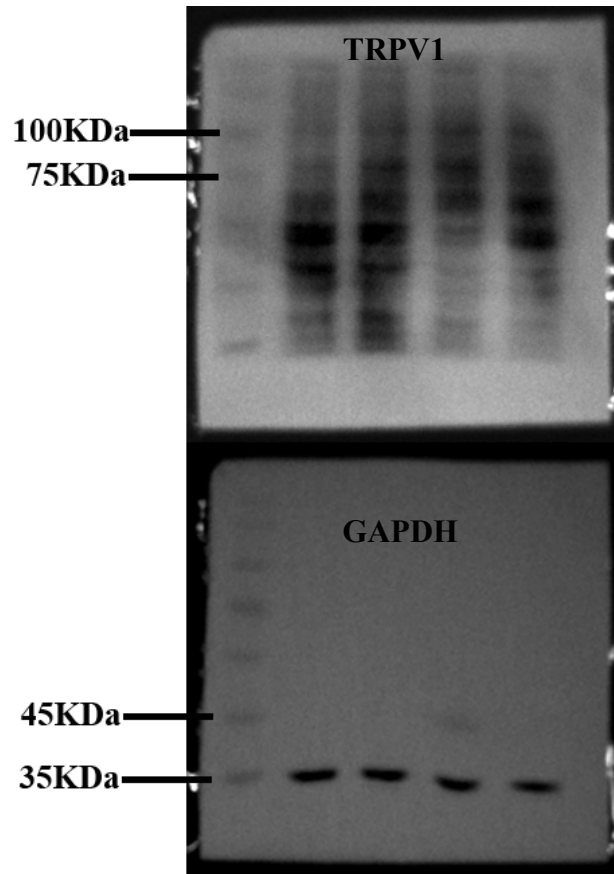

Figure 6F

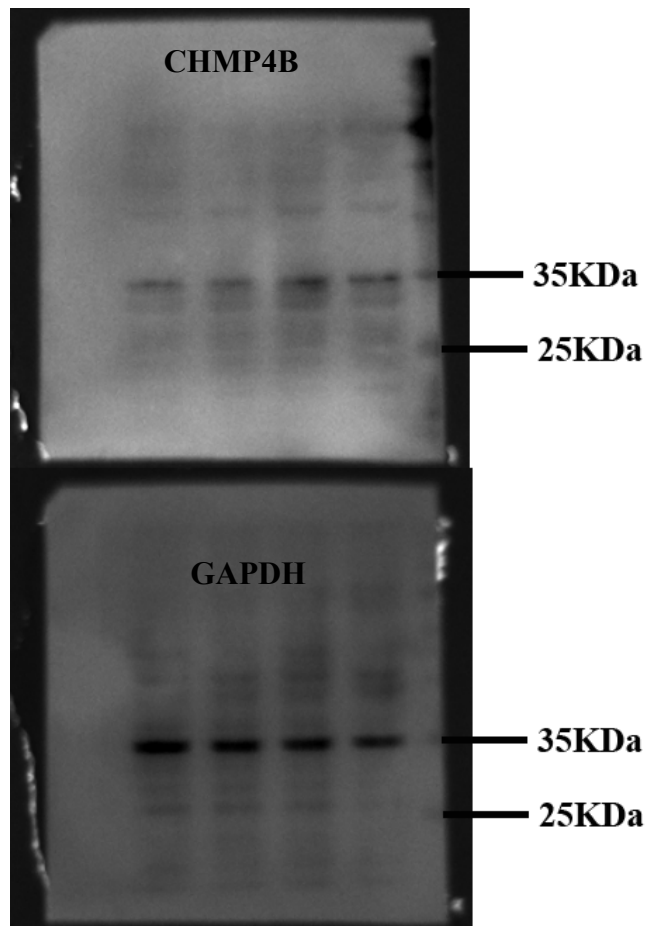

Figure 6I

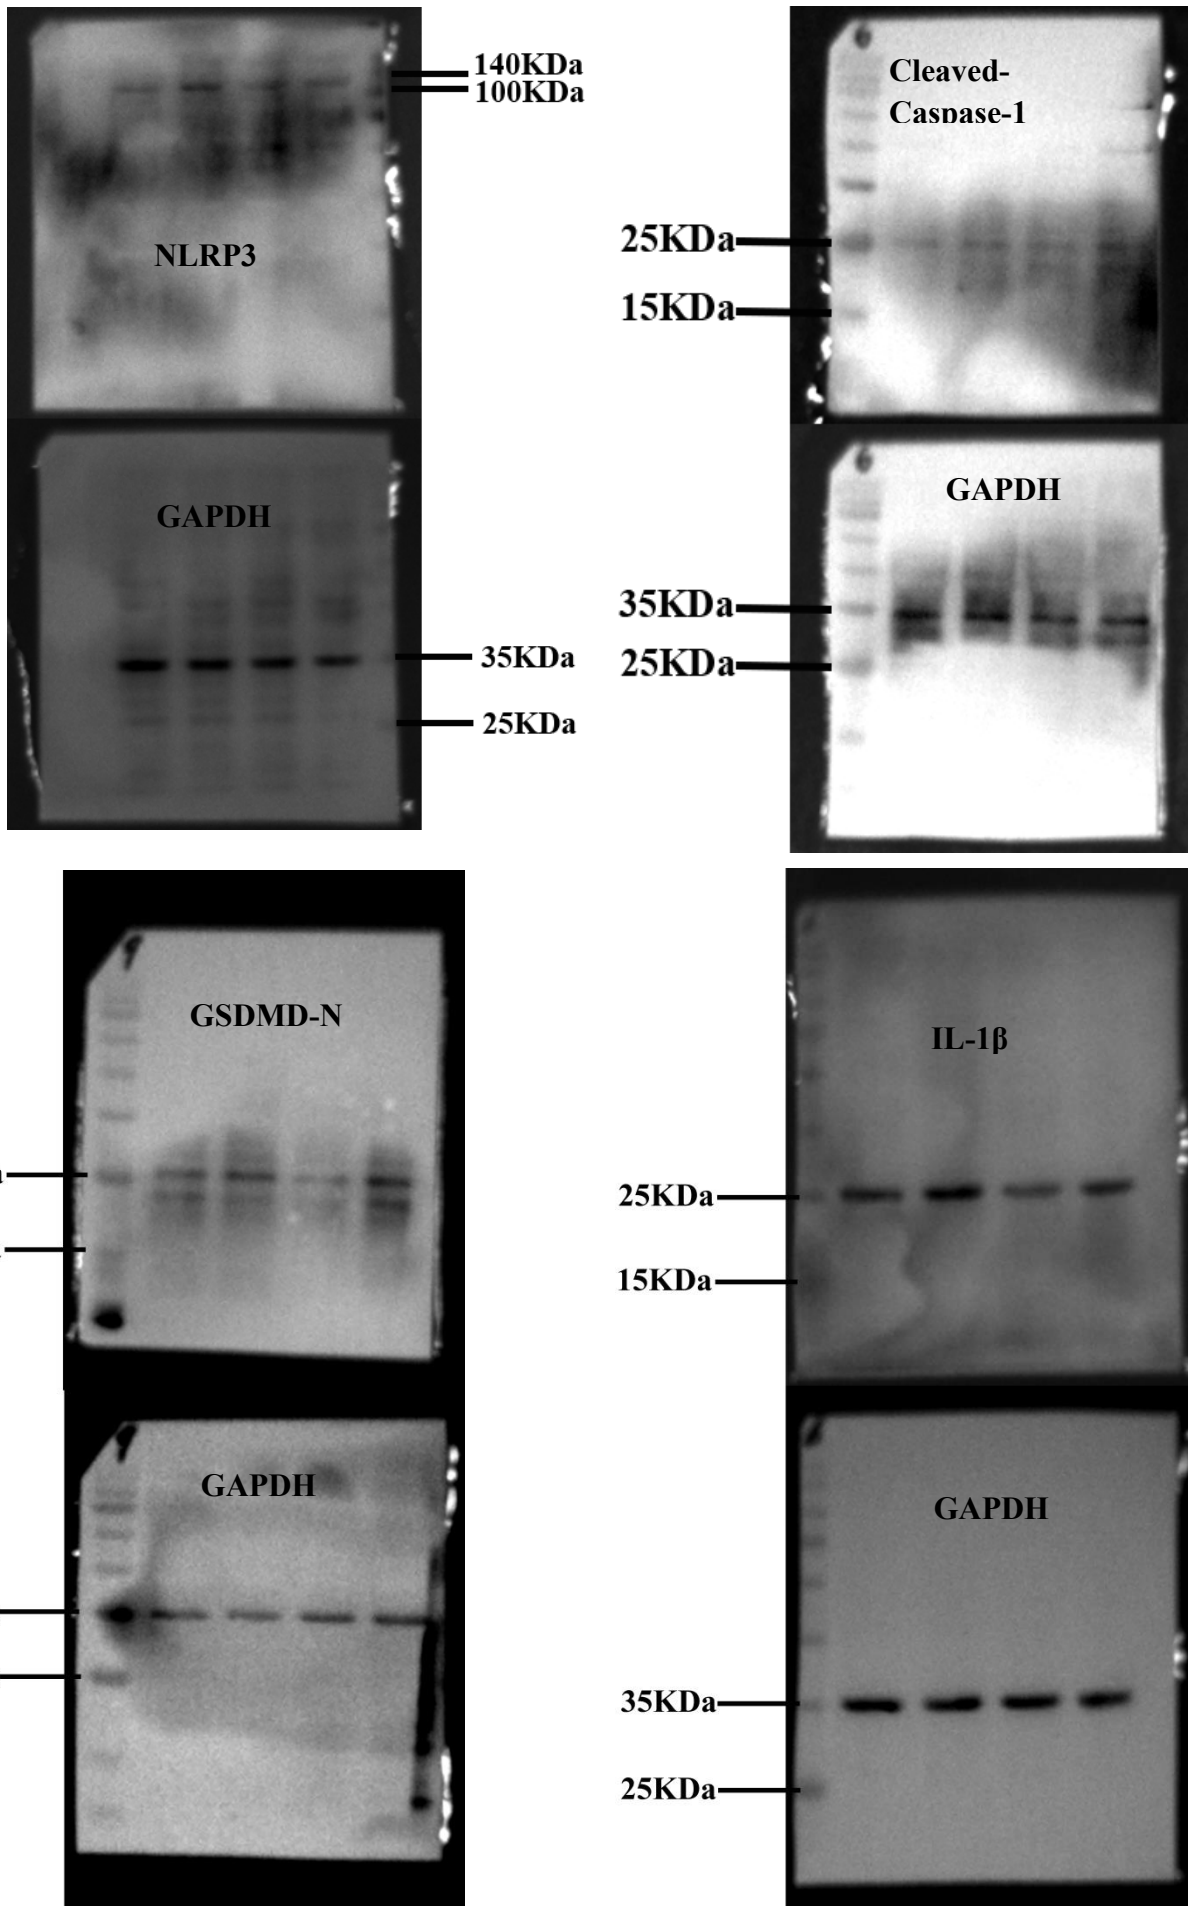

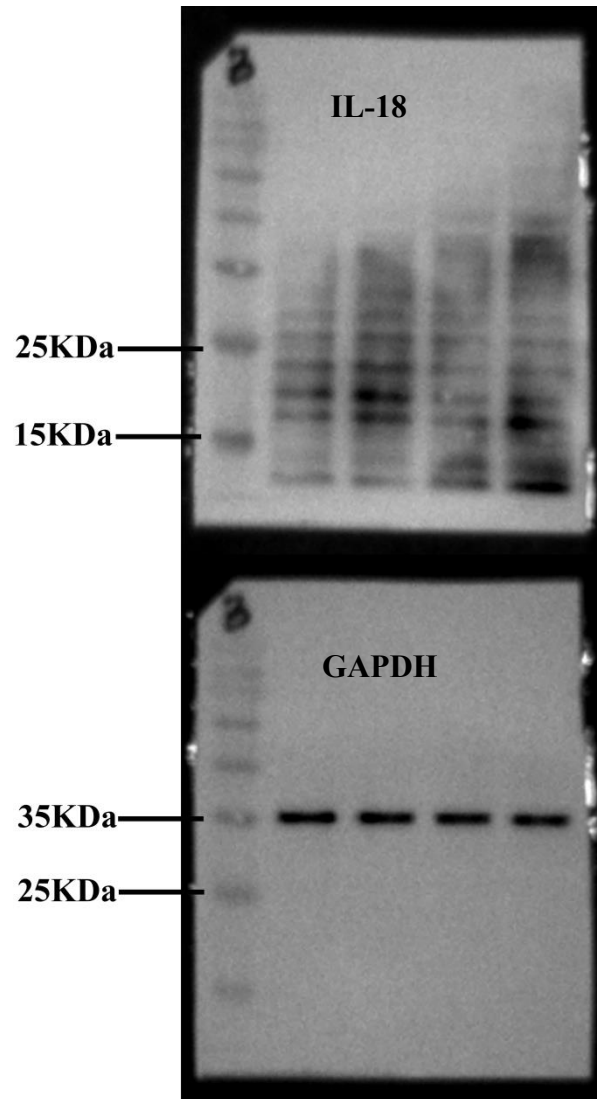

**Fig.1:**  
**GAPDH:**

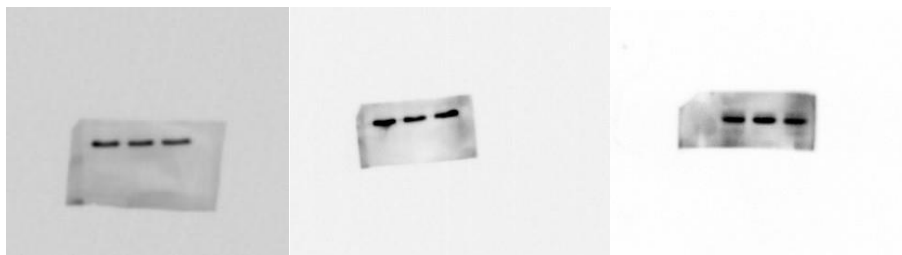

**NLRP3:**

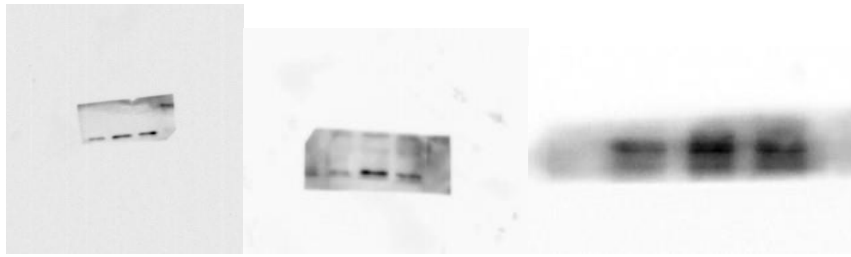

**Cleaved-caspase-1:**

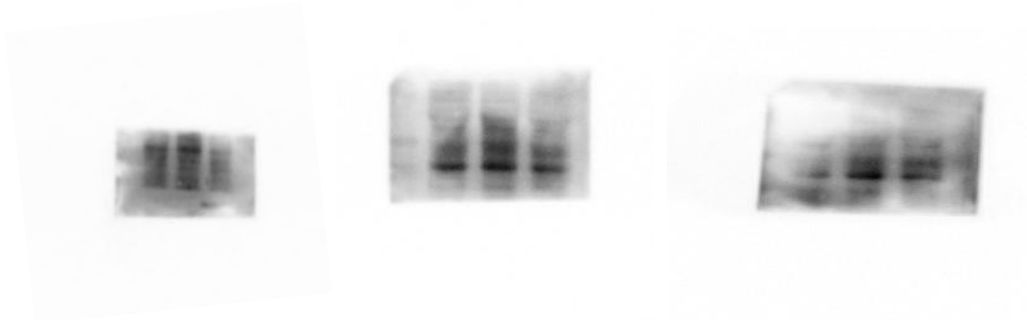

**GSDMD-N:**

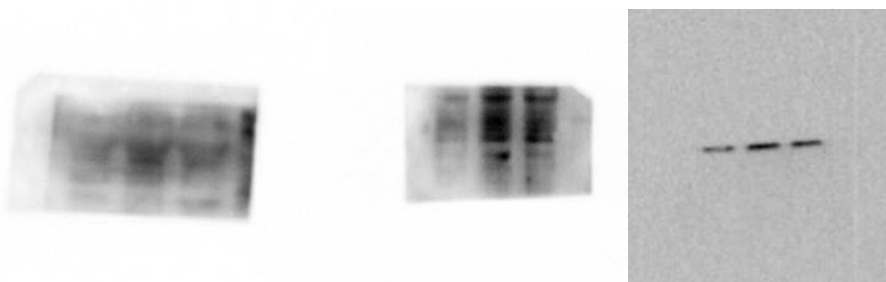

**Mature-IL-1β:**

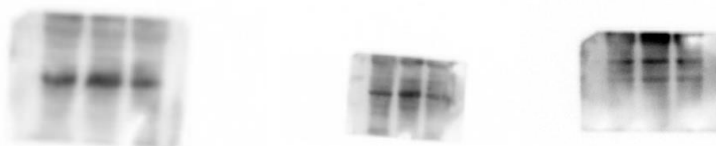

**Mature-IL-18:**

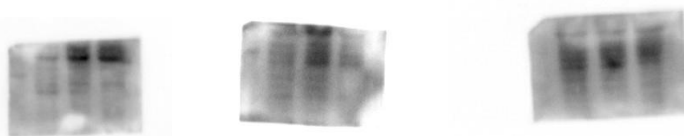

**Fig.2:**  
**GAPDH:**

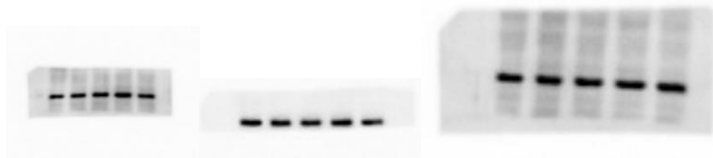

**NLRP3:**

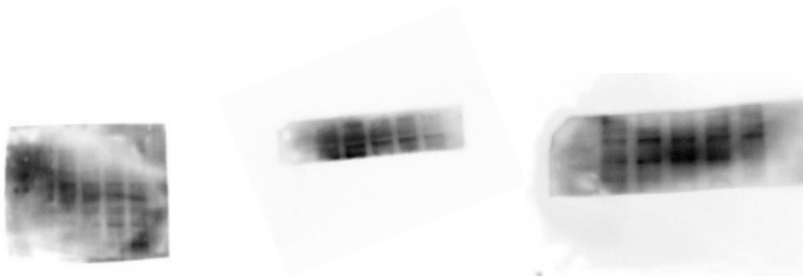

**Cleaved-caspase-1:**

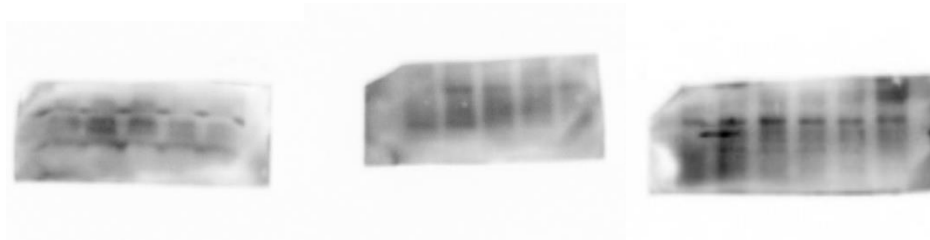

**GSDMD-N:**

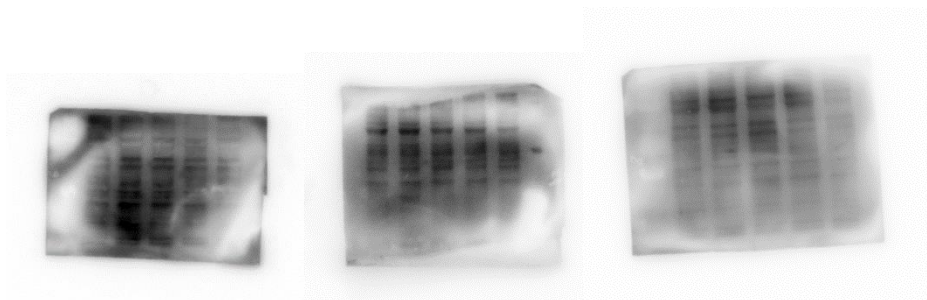

**Mature-IL-1β:**

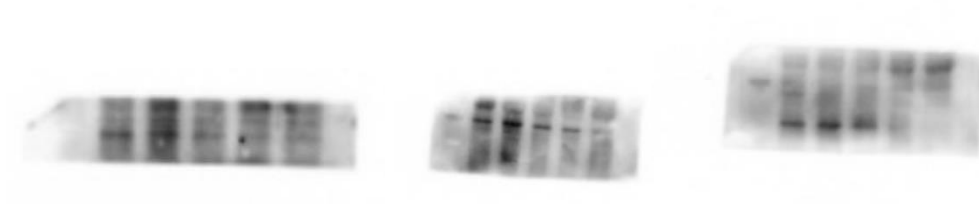

**Mature-IL-18:**

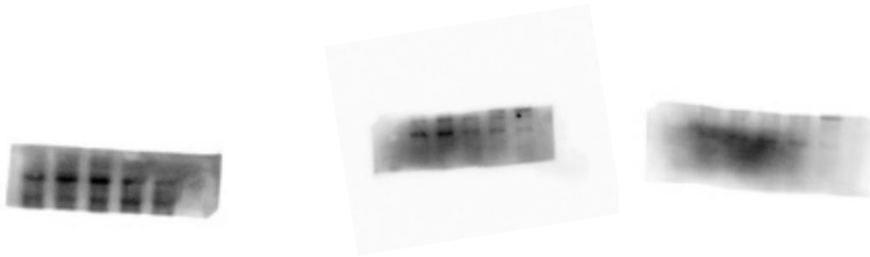

**Fig.3:**  
**GAPDH:**

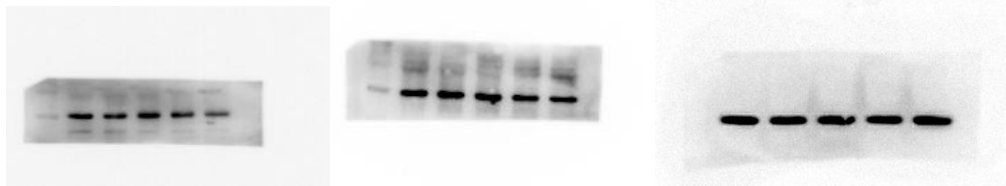

**CHMP4B:**

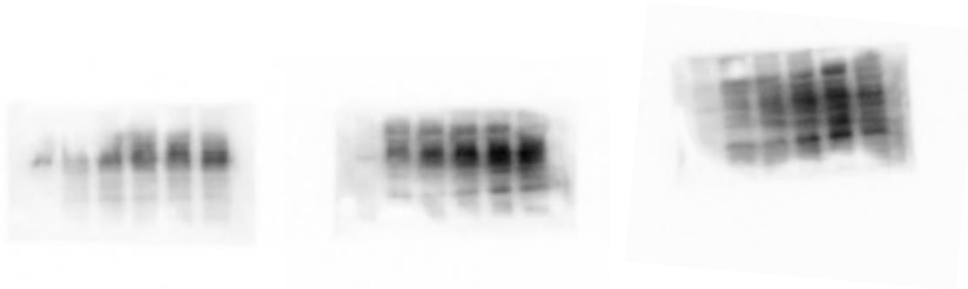

**Fig.4:**  
**GAPDH:**

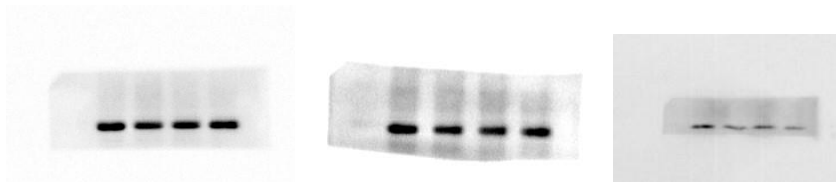

**CHMP4B:**

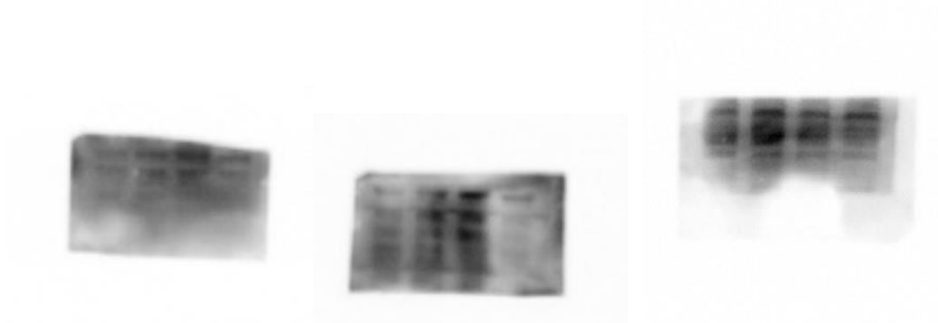

**NLRP3:**

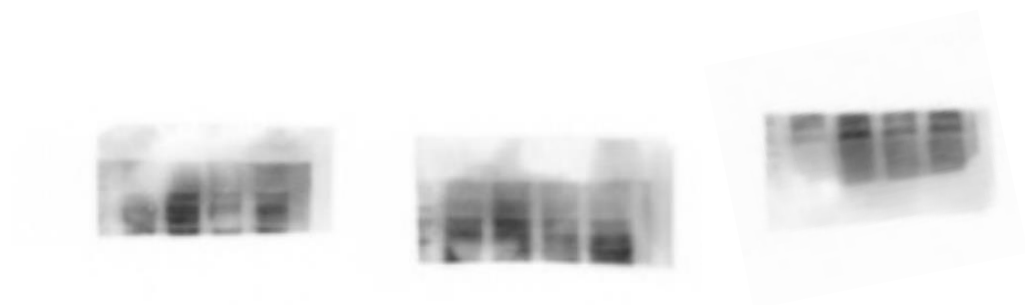

**Cleaved-caspase-1:**

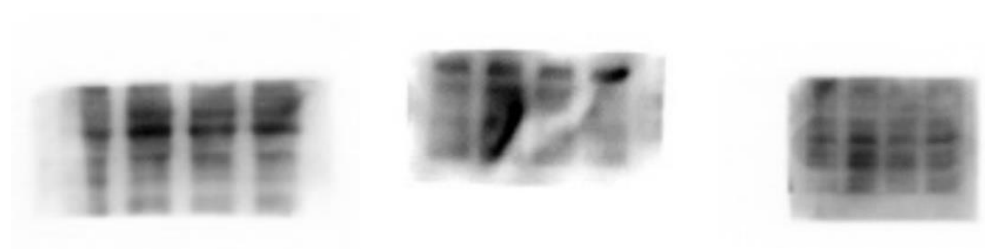

**GSDMD-N:**

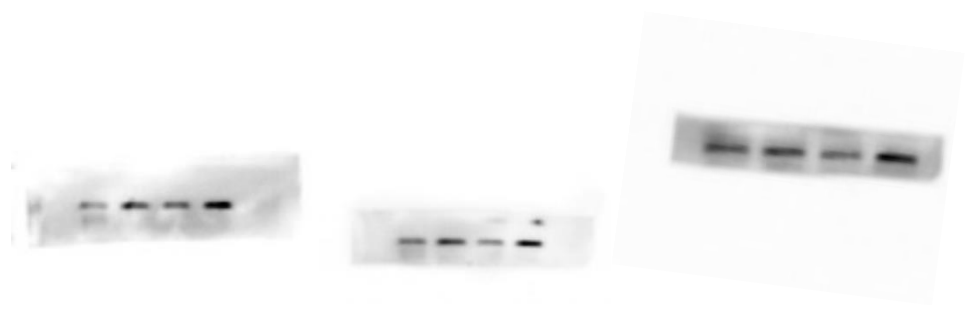

**Mature-IL-1β:**

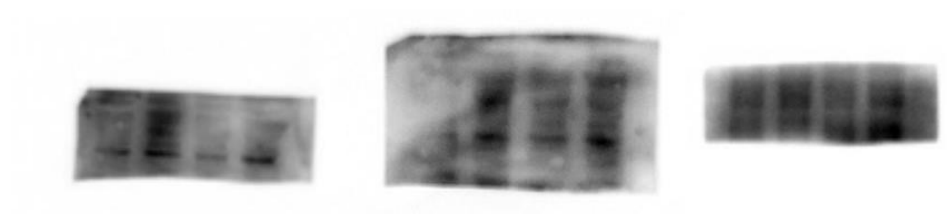

**Mature-IL-18:**

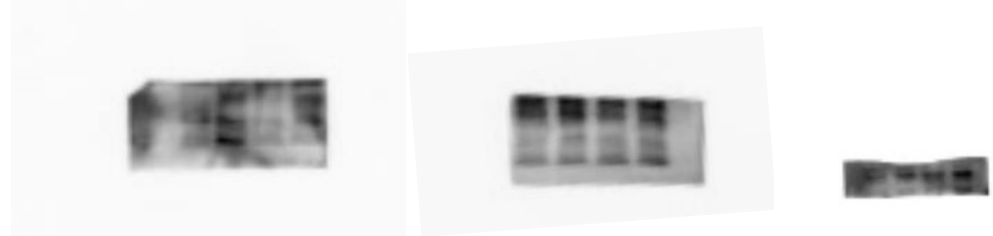

**Fig.5:  
GAPDH:**

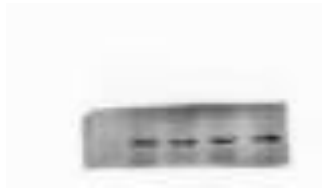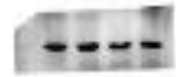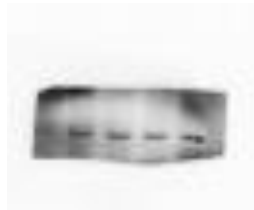

**TRPV1:**

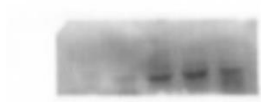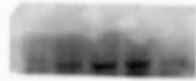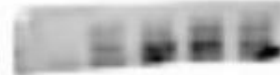

**CHMP4B:**

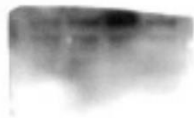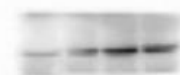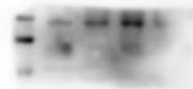

**NLRP3:**

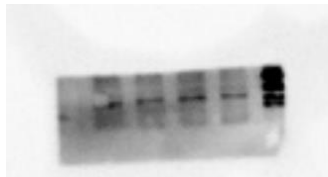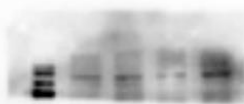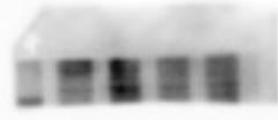

**Cleaved-caspase-1:**

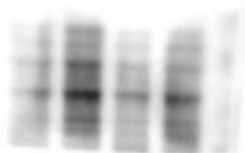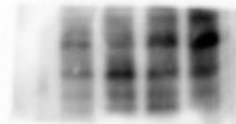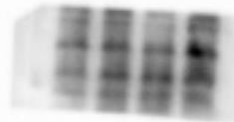

**GSDMD-N:**

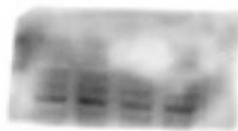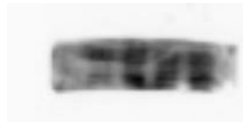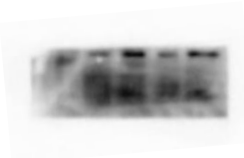

**Mature-IL-1β:**

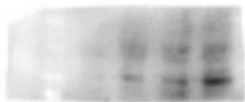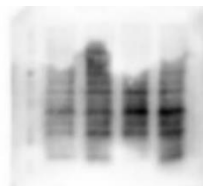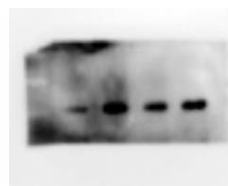



**Mature-IL-18:**

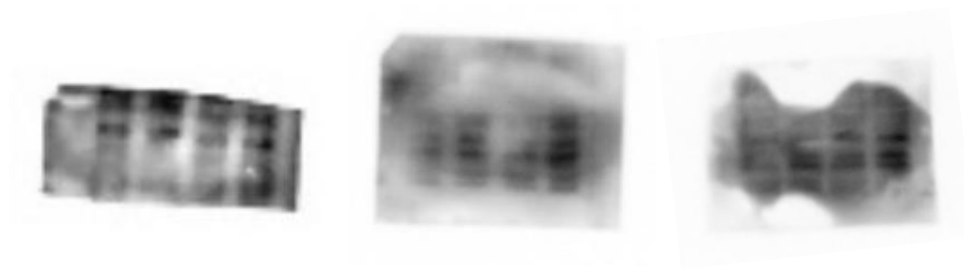

**Fig.6:**

**GAPDH:**

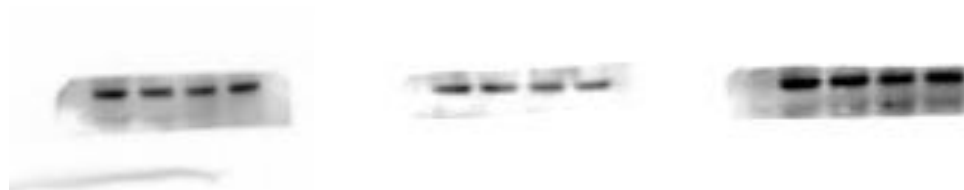

**TRPV1:**

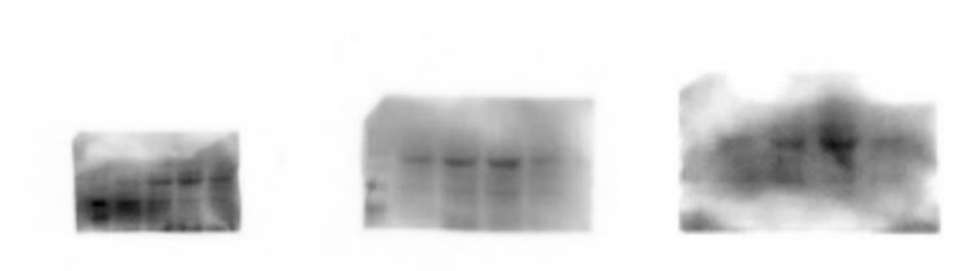

**CHMP4B:**

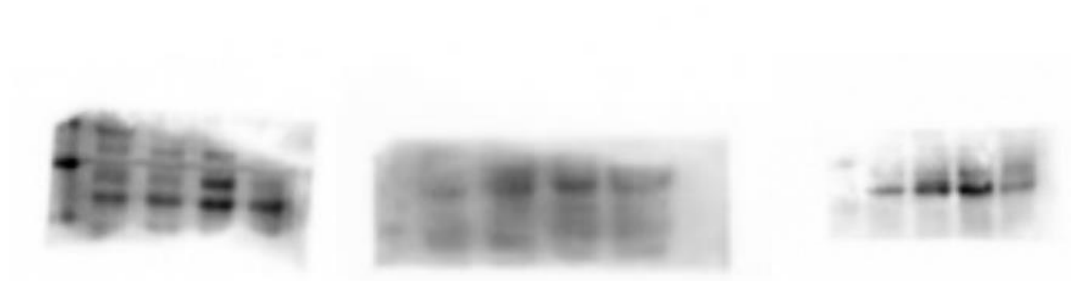

**NLRP3:**

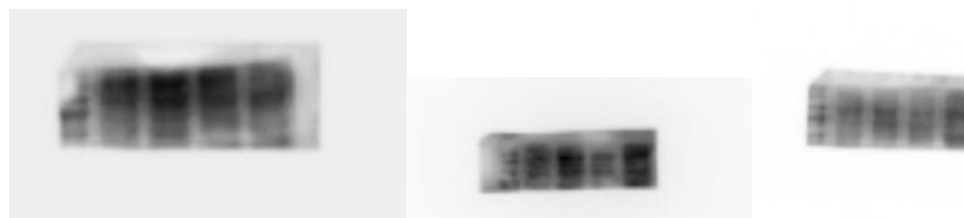

**Cleaved-caspase-1:**

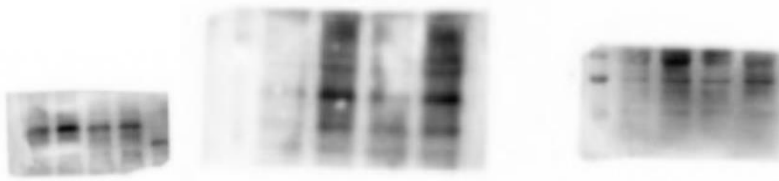

**GSDMD-N:**

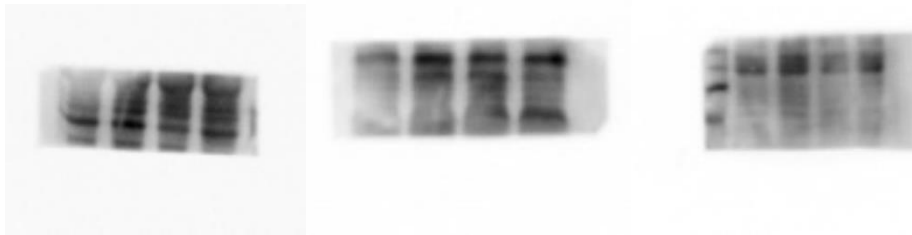

**Mature-IL-1β:**

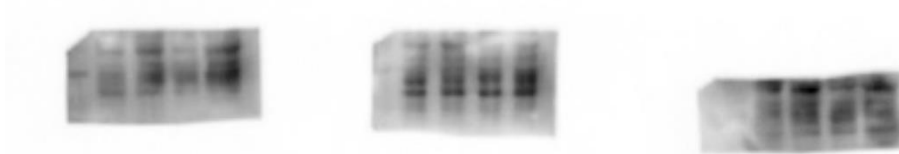

**Mature-IL-18:**

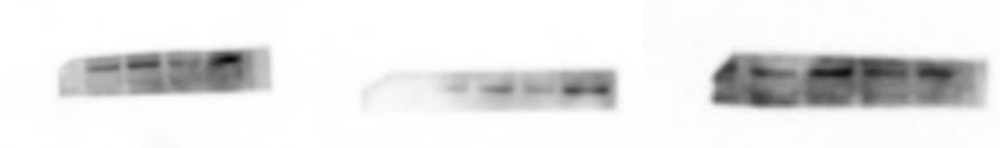

Supplement: d4fo00806e1.pdf [file d4fo00806e1.pdf]
