# Supplementary material for: Capsaicin alleviates acute alcohol-induced pyroptosis by activating ESCRT-III-dependent cell membrane repair in hepatocytes
Source: Royal Society of Chemistry journal article supplement (doi:10.1039/d4fo00806e), 2024-01-01
Supplement: d4fo00806e2.pdf [file d4fo00806e2.pdf]

AST

| Control     | Ethanol     | Ethanol+CAP |
|-------------|-------------|-------------|
| 59.43055189 | 103.8174826 | 57.03464789 |
| 72.39180699 | 109.2342301 | 65.70120434 |
| 50.21265354 | 128.7453556 | 88.70382776 |

ALT

| Control     | Ethanol     | Ethanol+CAP |
|-------------|-------------|-------------|
| 42.34375129 | 123.7140529 | 59.75619732 |
| 34.34885621 | 112.2670972 | 64.31230329 |
| 36.92287582 | 128.8207414 | 66.65817204 |

IL-18

| Control    | Ethanol     | Ethanol+CAP |
|------------|-------------|-------------|
| 95.6043956 | 131.165897  | 102.1978022 |
| 98.9010989 | 130.6942656 | 101.6483516 |
| 100        | 134.096521  | 107.6923077 |

IL-1  $\beta$

| Control   | Ethanol   | Ethanol+CAP |
|-----------|-----------|-------------|
| 99.3568   | 262.65442 | 120.686254  |
| 96.5485   | 236.1654  | 115.212     |
| 105.44522 | 256.84365 | 126.58425   |

IL-18

| Control     | Ethanol     | Ethanol+CAP1 | Ethanol+CAP2 | Ethanol+CAP3 |
|-------------|-------------|--------------|--------------|--------------|
| 90.10989011 | 131.8681319 | 113.1868132  | 113.7362637  | 103.2967033  |
| 82.41758242 | 129.1208791 | 123.0769231  | 114.2857143  | 99.45054945  |
| 86.26373626 | 130.4945055 | 122.8021978  | 122.5274725  | 101.3736264  |

IL-1  $\beta$

| Control  | Ethanol    | Ethanol+CAP1 | Ethanol+CAP2 | Ethanol+CAP3 |
|----------|------------|--------------|--------------|--------------|
| 9.59867  | 72.77948   | 44.88146     | 22.72715     | 15.752645    |
| 11.23973 | 68.266565  | 46.112255    | 25.599005    | 16.16291     |
| 10.4192  | 70.5230225 | 45.4968575   | 24.1630775   | 15.9577775   |

ALT:

| Control | Ethanol  | Ethanol+CAP | Ethanol+EDTA |
|---------|----------|-------------|--------------|
| 36.5462 | 107.7482 | 58.64562    | 98.63273     |
| 41      | 103.3452 | 59.7832     | 96.7423      |
| 37.8738 | 104.6473 | 55.6382     | 101.3764     |

AST:

| Control  | Ethanol | Ethanol+CAP | Ethanol+EDTA |
|----------|---------|-------------|--------------|
| 80.78321 | 131.452 | 95.7231     | 110.341      |

|          |            |         |          |
|----------|------------|---------|----------|
| 79.88411 | 145.392341 | 85.8371 | 121.341  |
| 75.88371 | 121.341    | 83.9841 | 134.2341 |

IL-18

| Control     | Ethanol     | Ethanol+CAP | Ethanol+CPZ |
|-------------|-------------|-------------|-------------|
| 57.14285714 | 132.967033  | 70.32967033 | 128.021978  |
| 66.48351648 | 123.6263736 | 59.34065934 | 118.6813187 |
| 61.81318681 | 128.2967033 | 64.83516484 | 123.3516484 |

IL-1  $\beta$

| Control     | Ethanol     | Ethanol+CAP | Ethanol+CPZ |
|-------------|-------------|-------------|-------------|
| 53.2967033  | 81.86813187 | 64.83516484 | 74.17582418 |
| 55.49450549 | 79.67032967 | 63.18681319 | 81.86813187 |
| 54.3956044  | 80.76923077 | 64.01098901 | 78.02197802 |

IL-18

| Control    | Ethanol     | Ethanol+CAP | Ethanol+CPZ |
|------------|-------------|-------------|-------------|
| 100        | 122.5274725 | 102.1978022 | 110.4395604 |
| 95.6043956 | 121.978022  | 101.6483516 | 111.5384615 |
| 98.9010989 | 127.4725275 | 107.6923077 | 108.7912088 |

IL-1  $\beta$

| Control   | Ethanol   | Ethanol+CAP | Ethanol+CPZ |
|-----------|-----------|-------------|-------------|
| 101.93143 | 253.33927 | 119.55217   | 209.94004   |
| 107.80501 | 215.161   | 127.38361   | 208.96111   |
| 119.55217 | 225.60292 | 107.80501   | 258.56023   |
